# Supplementary material
Source: ML conference proceedings conference paper supplement (https://proceedings.mlr.press/v119/calder20a.html)
Supplement: Supplementary file [file calder20a-supp.pdf]

---

## Supplementary Material for Poisson Learning: Graph Based Semi-Supervised Learning At Very Low Label Rates

---

### A. Proofs

We provide the proofs by section.

#### A.1. Proofs for Section 2.1

We recall  $X_0^x, X_1^x, X_2^x, \dots$  is a random walk on  $X$  starting at  $X_0^x = x$  with transition probabilities

$$\mathbb{P}(X_k^x = x_j \mid X_{k-1}^x = x_i) = \frac{w_{ij}}{d_i}.$$

Before giving the proof of Theorem 2.1, we recall some properties of random walks and Markov chains. The random walk described above induces a Markov chain with state space  $X$ . Since the graph is connected and  $X$  is finite, the Markov chain is *positive recurrent*. We also assume the Markov chain is *aperiodic*. This implies the distribution of the random walker converges to the invariant distribution of the Markov chain as  $k \rightarrow \infty$ . In particular, choose any initial distribution  $p_0 \in \ell^2(X)$  such that  $\sum_{i=1}^n p_0(x_i) = 1$  and  $p_0 \geq 0$ , and define

$$p_{k+1}(x_i) = \sum_{j=1}^n \frac{w_{ij}}{d_j} p_k(x_j). \quad (\text{A.1})$$

Then  $p_k$  is the distribution of the random walker after  $k$  steps. Since the Markov chain is positive recurrent and aperiodic we have that

$$\lim_{k \rightarrow \infty} p_k(x_i) = \pi(x_i)$$

for all  $i$ , where

$$\pi(x_i) = \frac{d_i}{\sum_{i=1}^n d_i}$$

is the invariant distribution of the Markov chain. It is simple to check that if  $p_0 \in \ell^2(X)$  is any function (i.e., not necessarily a probability distribution), and we define  $p_k$  by the iteration (A.1), then

$$\lim_{k \rightarrow \infty} p_k(x_i) = \pi(x_i) \sum_{j=1}^n p_0(x_j). \quad (\text{A.2})$$

We now give the proof of Theorem 2.1.

*Proof of Theorem 2.1.* Define the normalized Green's function

$$G_T(x_i, x_j) = \frac{1}{d_i} \mathbb{E} \left[ \sum_{k=0}^T \mathbf{1}_{\{X_k^{x_j} = x_i\}} \right] = \frac{1}{d_i} \sum_{k=0}^T \mathbb{P}(X_k^{x_j} = x_i).$$

Then we have

$$\begin{aligned}
 d_i G_T(x_i, x_j) &= \delta_{ij} + \sum_{k=1}^T \sum_{\ell=1}^n \frac{w_{\ell i}}{d_\ell} \mathbb{P}(X_{k-1}^{x_j} = x_\ell) \\
 &= \delta_{ij} + \sum_{\ell=1}^n \frac{w_{\ell i}}{d_\ell} \sum_{k=1}^T \mathbb{P}(X_{k-1}^{x_j} = x_\ell) \\
 &= \delta_{ij} + \sum_{\ell=1}^n \frac{w_{\ell i}}{d_\ell} \sum_{k=0}^{T-1} \mathbb{P}(X_k^{x_j} = x_\ell) \\
 &= \delta_{ij} + \sum_{\ell=1}^n w_{\ell i} G_{T-1}(x_\ell, x_j).
 \end{aligned}$$

Therefore we have

$$d_i(G_T(x_i, x_j) - G_{T-1}(x_i, x_j)) + \mathcal{L}G_{T-1}(x_i, x_j) = \delta_{ij},$$

where the Laplacian  $\mathcal{L}$  is applied to the first variable of  $G_{T-1}$  while the second variable is fixed (i.e.  $\mathcal{L}G_{T-1}(x_i, x_j) = [\mathcal{L}G_{T-1}(\cdot, x_j)]_{x_i}$ ). Since

$$u_T(x_i) = \sum_{j=1}^m (y_j - \bar{y}_u) G_T(x_i, x_j)$$

we have

$$d_i(u_T(x_i) - u_{T-1}(x_i)) + \mathcal{L}u_{T-1}(x_i) = \sum_{j=1}^m (y_j - \bar{y}_u) \delta_{ij}.$$

Summing both sides over  $i = 1, \dots, n$  we find that

$$(u_T)_{d,X} = \sum_{i=1}^n d_i u_T(x_i) = \sum_{i=1}^n d_i u_{T-1}(x_i) = (u_{T-1})_{d,X},$$

where  $d = (d_1, d_2, \dots, d_n)$  is the vector of degrees. Therefore  $(u_T)_{d,X} = (u_{T-1})_{d,X} = \dots = (u_0)_{d,X}$ . Noting that

$$d_i u_0(x_i) = \sum_{j=1}^m (y_j - \bar{y}_u) \delta_{ij},$$

we have  $(u_0)_{d,X} = 0$ , and so  $(u_T)_{d,X} = 0$  for all  $T \geq 0$ . Let  $u \in \ell^2(X)$  be the solution of

$$\mathcal{L}u(x_i) = \sum_{j=1}^m (y_j - \bar{y}_u) \delta_{ij}$$

satisfying  $(u)_{d,X} = 0$ . Define  $v_T(x_i) = d_i(u_T(x_i) - u(x_i))$ . We then check that  $v_T$  satisfies

$$v_T(x_i) = \sum_{j=1}^n \frac{w_{ij}}{d_j} v_{T-1}(x_j),$$

and  $(v_T)_X = 0$ . Since the random walk is aperiodic and the graph is connected, we have by (A.2) that  $\lim_{T \rightarrow \infty} v_T(x_i) = \pi(x_i)(v_0)_X = 0$ , which completes the proof.  $\square$

## A.2. Proofs for Section 2.2

We first review some additional calculus on graphs. The *graph divergence* of a vector field  $V$  is defined as

$$\operatorname{div} V(x_i) = \sum_{j=1}^n w_{ij} V(x_i, x_j).$$

The divergence is the negative adjoint of the gradient; that is, for every vector field  $V \in \ell^2(X^2)$  and function  $u \in \ell^2(X)$

$$(\nabla u, V)_{\ell^2(X^2)} = -(u, \operatorname{div} V)_{\ell^2(X)}. \quad (\text{A.3})$$

We also define  $\|u\|_{\ell^p(X)}^p = \sum_{i=1}^n |u(x_i)|^p$  and

$$\|V\|_{\ell^p(X^2)}^p = \frac{1}{2} \sum_{i,j=1}^n w_{ij} |V(x_i, x_j)|^p,$$

where  $|\cdot|$  is the Euclidean norm on  $\mathbb{R}^k$ .

The graph Laplacian  $\mathcal{L}u$  of a function  $u \in \ell^2(X)$  is defined as negative of the composition of gradient and divergence

$$\mathcal{L}u(x_i) = -\operatorname{div}(\nabla u)(x_i) = \sum_{j=1}^n w_{ij}(u(x_i) - u(x_j)).$$

The operator  $\mathcal{L}$  is the *unnormalized* graph Laplacian. Using (A.3) we have

$$(\mathcal{L}u, v)_{\ell^2(X)} = (-\operatorname{div} \nabla u, v)_{\ell^2(X)} = (\nabla u, \nabla v)_{\ell^2(X^2)}.$$

In particular  $(\mathcal{L}u, v)_{\ell^2(X)} = (u, \mathcal{L}v)_{\ell^2(X)}$ , and so the graph Laplacian  $\mathcal{L}$  is self-adjoint as an operator  $\mathcal{L} : \ell^2(X) \rightarrow \ell^2(X)$ . We also note that

$$(\mathcal{L}u, u)_{\ell^2(X)} = (\nabla u, \nabla u)_{\ell^2(X^2)} = \|\nabla u\|_{\ell^2(X^2)}^2,$$

that is,  $\mathcal{L}$  is positive semi-definite.

The variational interpretation of Poisson learning can be directly extended to  $\ell^p$  versions, so we proceed in generality here. For a function  $u : X \rightarrow \mathbb{R}^k$  and a positive vector  $a \in \mathbb{R}^n$  (meaning  $a_i > 0$  for all  $i = 1, \dots, n$ ) we define the weighted mean value

$$(u)_{a,X} := \frac{1}{\sum_{i=1}^n a_i} \sum_{i=1}^n a_i u(x_i).$$

We define the space of weighted mean-zero functions

$$\ell_{a,0}^p(X) = \{u \in \ell^p(X) : (u)_{a,X} = 0\}.$$

For  $p \geq 1$  and  $\mu > 0$  we consider the variational problem

$$\min_{u \in \ell_{a,0}^p(X)} \left\{ \frac{1}{p} \|\nabla u\|_{\ell^p(X^2)}^p - \mu \sum_{j=1}^m (y_j - \bar{y}_u) \cdot u(x_j) \right\} \quad (\text{A.4})$$

where  $\bar{y}_u = \frac{1}{m} \sum_{j=1}^m y_j$ . This generalizes the variational problem (2.8) for Poisson learning, and the theorem below generalizes Theorem 2.3.

**Theorem A.1.** *Assume  $G$  is connected. For any  $p > 1$ , positive  $a \in \mathbb{R}^n$ , and  $\mu \geq 0$ , there exists a unique solution  $u \in \ell_{a,0}^p(X)$  of (A.4). Furthermore, the minimizer  $u$  satisfies the graph  $p$ -Laplace equation*

$$-\operatorname{div}(|\nabla u|^{p-2} \nabla u)(x_i) = \mu \sum_{j=1}^m (y_j - \bar{y}_u) \delta_{ij}. \quad (\text{A.5})$$

We give the proof of Theorem A.1 below, after some remarks and other results.

**Remark A.2.** When  $p = 1$ , solutions of (A.4) may not exist for all  $\mu \geq 0$ , since the variational problem (A.4) may not be bounded from below. We can show that there exists  $C > 0$  such that if  $\mu < C$ , the variational problem is bounded from below and our argument for existence in Theorem A.1 goes through.

It turns out that  $\mu > 0$  is a redundant parameter when  $p > 1$ .

**Lemma A.3.** *Let  $p > 1$  and for  $\mu > 0$  let  $u_\mu$  be the solution of (A.4). Then,  $u_\mu = \mu^{1/(p-1)}u_1$ .*

It follows from Lemma A.3 that when  $p > 1$ , the fidelity parameter  $\mu > 0$  is *completely irrelevant* for classification problems, since the identity  $u_\mu = \mu^{1/(p-1)}u_1$  implies that the label decision (2.2) gives the same labeling for *any* value of  $\mu > 0$ . Hence, in Poisson learning with  $p > 1$  we always take  $\mu = 1$ . This remark is false for  $p = 1$ .

Before proving Theorem A.1 we first record a Poincaré inequality. The proof is standard but we include it for completeness. We can prove the Poincaré inequality for non-negative vectors  $a \in \mathbb{R}^n$ , meaning that  $a_i \geq 0$  for every  $i = 1, \dots, n$  as long as  $\sum_{i=1}^n a_i > 0$ .

**Proposition A.4.** *Assume  $G$  is connected,  $a \in \mathbb{R}^d$  is non-negative with  $\sum_{i=1}^n a_i > 0$ , and  $p \geq 1$ . There exists  $\lambda_p > 0$  such that*

$$\lambda_p \|u - (u)_{a,X}\|_{\ell^p(X)} \leq \|\nabla u\|_{\ell^p(X^2)}, \quad (\text{A.6})$$

for all  $u \in \ell^p(X)$ .

*Proof.* Define

$$\lambda_p = \min_{\substack{u \in \ell^p(X) \\ u \neq (u)_{a,X}}} \frac{\|\nabla u\|_{\ell^p(X^2)}}{\|u - (u)_{a,X}\|_{\ell^p(X)}}.$$

Then clearly (A.6) holds for this choice of  $\lambda_p$ , and  $\lambda_p \geq 0$ . If  $\lambda_p = 0$ , then there exists a sequence  $u_k \in \ell^p(X)$  with  $u_k \neq (u_k)_{a,X}$  such that

$$\frac{\|\nabla u_k\|_{\ell^p(X^2)}}{\|u_k - (u_k)_{a,X}\|_{\ell^p(X)}} \leq \frac{1}{k}.$$

We may assume that  $(u_k)_{a,X} = 0$  and  $\|u_k\|_{\ell^p(X)} = 1$ , and so

$$\|\nabla u_k\|_{\ell^p(X^2)} \leq \frac{1}{k}. \quad (\text{A.7})$$

Since  $|u_k(x)| \leq \|u_k\|_{\ell^p(X)} = 1$ , the sequence  $u_k$  is uniformly bounded and by the Bolzano-Weierstrauss Theorem there exists a subsequence  $u_{k_j}$  such that  $u_{k_j}(x_i)$  is a convergent sequence in  $\mathbb{R}^k$  for every  $i$ . We denote  $u(x_i) = \lim_{j \rightarrow \infty} u_{k_j}(x_i)$ . Since  $\|u_{k_j}\|_{\ell^p(X)} = 1$  we have  $\|u\|_{\ell^p(X)} = 1$ , and thus  $u \neq 0$ . Similarly, since  $(u_k)_{a,X} = 0$  we have  $(u)_{a,X} = 0$  as well. On the other hand it follows from (A.7) that  $\|\nabla u\|_{\ell^p(X^2)} = 0$ , and so

$$w_{ij}(u(x_i) - u(x_j)) = 0 \quad \text{for all } i, j.$$

It follows that  $u(x_i) = u(x_j)$  whenever  $w_{ij} > 0$ . Since the graph is connected, it follows that  $u$  is constant. Since  $(u)_{a,X} = 0$  we must have  $u \equiv 0$ , which is a contradiction, since  $\|u\|_{\ell^p(X)} = 1$ . Therefore  $\lambda_p > 0$ , which completes the proof.  $\square$

We can now prove Theorem A.1.

*Proof of Theorem A.1.* Let us write

$$I_p(u) = \frac{1}{p} \|\nabla u\|_{\ell^p(X^2)}^p - \mu \sum_{j=1}^m (y_j - \bar{y}_u) \cdot u(x_j). \quad (\text{A.8})$$

By Proposition A.4 we have

$$I_p(u) \geq \frac{1}{p} \lambda_p^p \|u\|_{\ell^p(X)}^p - \mu \sum_{j=1}^m (y_j - \bar{y}_u) \cdot u(x_j)$$

for  $u \in \ell_{a,0}^p(X)$ . By Hölder's inequality we have

$$\begin{aligned} \sum_{j=1}^m (y_j - \bar{y}_u) \cdot u(x_j) &\leq \sum_{j=1}^m |y_j - \bar{y}_u| |u(x_j)| \\ &\leq \left( \sum_{j=1}^m |y_j - \bar{y}_u|^q \right)^{1/q} \left( \sum_{j=1}^m |u(x_j)|^p \right)^{1/p} \\ &\leq \left( \sum_{j=1}^m |y_j - \bar{y}_u|^q \right)^{1/q} \|u\|_{\ell^p(X)}, \end{aligned}$$

where  $q = p/(p-1)$ . Letting  $C = \left( \sum_{j=1}^m |y_j - \bar{y}_u|^q \right)^{1/q}$  we have

$$I_p(u) \geq \frac{1}{p} \lambda_p^p \|u\|_{\ell^p(X)}^p - C\mu \|u\|_{\ell^p(X)}. \quad (\text{A.9})$$

Since  $p > 1$ , we see that  $I_p$  is bounded below.

Let  $u_k \in \ell_{a,0}^p(X)$  be a minimizing sequence, that is, we take  $u_k$  so that

$$-\infty < \inf_{u \in \ell_{a,0}^p(X)} I_p(u) = \lim_{k \rightarrow \infty} I_p(u_k).$$

By (A.9) we have that

$$\frac{1}{p} \lambda_p^p \|u_k\|_{\ell^p(X)}^p - C\mu \|u_k\|_{\ell^p(X)} \leq \inf_{u \in \ell_{a,0}^p(X)} I_p(u) + 1,$$

for  $k$  sufficiently large. Since  $p > 1$ , it follows that there exists  $M > 0$  such that  $\|u_k\|_{\ell^p(X)} \leq M$  for all  $k \geq 1$ . Since  $|u_k(x_i)| \leq \|u_k\|_{\ell^p(X)} \leq M$  for all  $i = 1, \dots, n$ , we can apply the Bolzano-Weierstrauss Theorem to extract a subsequence  $u_{k_j}$  such that  $u_{k_j}(x_i)$  is a convergent sequence in  $\mathbb{R}^k$  for all  $i = 1, \dots, n$ . We denote by  $u^*(x_i)$  the limit of  $u_{k_j}(x_i)$  for all  $i$ . By continuity of  $I_p$  we have

$$\inf_{u \in \ell_{a,0}^p(X)} I_p(u) = \lim_{j \rightarrow \infty} I_p(u_{k_j}) = I_p(u^*),$$

and  $(u^*)_{a,X} = 0$ . This shows that there exists a solution of (A.4).

We now show that any solution of (A.4) satisfies  $-\operatorname{div}(|\nabla u|^{p-2} \nabla u) = \mu f$ . The proof follows from taking a variation. Let  $v \in \ell_{a,0}^p(X)$  and consider  $g(t) := I_p(u + tv)$ , where  $I_p$  is defined in (A.8). Then  $g$  has a minimum at  $t = 0$  and hence  $g'(0) = 0$ . We now compute

$$\begin{aligned} g'(0) &= \frac{d}{dt} \Big|_{t=0} \left\{ \frac{1}{p} \|\nabla u + t \nabla v\|_{\ell^p(X^2)}^p - \mu \sum_{j=1}^m (y_j - \bar{y}_u) \cdot (u(x_j) + tv(x_j)) \right\} \\ &= \frac{1}{2p} \sum_{i,j=1}^n w_{ij} \frac{d}{dt} \Big|_{t=0} |\nabla u(x_i, x_j) + t \nabla v(x_i, x_j)|^p - \mu \sum_{j=1}^m (y_j - \bar{y}_u) \cdot v(x_j) \\ &= \frac{1}{2} \sum_{i,j=1}^n w_{ij} |\nabla u(x_i, x_j)|^{p-2} \nabla u(x_i, x_j) \cdot \nabla v(x_i, x_j) - \mu \sum_{j=1}^m (y_j - \bar{y}_u) \cdot v(x_j) \\ &= (|\nabla u|^{p-2} \nabla u, \nabla v)_{\ell^2(X^2)} - \mu \sum_{j=1}^m (y_j - \bar{y}_u) \cdot v(x_j) \\ &= (-\operatorname{div}(|\nabla u|^{p-2} \nabla u), v)_{\ell^2(X)} - \mu \sum_{j=1}^m (y_j - \bar{y}_u) \cdot v(x_j) \\ &= (-\operatorname{div}(|\nabla u|^{p-2} \nabla u) - \mu f, v)_{\ell^2(X)}, \end{aligned}$$

where

$$f(x_i) = \sum_{j=1}^m (y_j - \bar{y}_u) \delta_{ij}.$$

We choose

$$v(x_i) = \frac{1}{a_i} (-\operatorname{div} (|\nabla u|^{p-2} \nabla u) (x_i) - \mu f(x_i))$$

then

$$(v)_{a,X} = \sum_{i=1}^n (-\operatorname{div} (|\nabla u|^{p-2} \nabla u) (x_i) - \mu f(x_i)) = 0$$

so  $v \in \ell_{a,0}^p(X)$ . Moreover, for this choice of  $v$ ,

$$0 = g'(0) = \sum_{i=1}^n \frac{1}{a_i} |\operatorname{div} (|\nabla u|^{p-2} \nabla u) (x_i) + \mu f(x_i)|^2 \geq \frac{1}{\max a_i} \|\operatorname{div} (|\nabla u|^{p-2} \nabla u) (x_i) + \mu f(x_i)\|_{\ell^2(X)}^2.$$

So,  $-\operatorname{div} (|\nabla u|^{p-2} \nabla u) = \mu f$  as required.

To prove uniqueness, let  $u, v \in \ell_{a,0}^p(X)$  be minimizers of (A.4). Then  $u$  and  $v$  satisfy (A.5) which we write as

$$-\operatorname{div} (|\nabla u|^{p-2} \nabla u) = \mu f.$$

Applying Lemma A.5 (below) we find that  $\|u - v\|_{\ell^p(X)} = 0$  and so  $u = v$ . □

In the above proof we used a quantitative error estimate which is of interest in its own right. The estimate was on equations of the form

$$-\operatorname{div} (|\nabla u|^{p-2} \nabla u) = f$$

when  $f \in \ell_0^p(X)$ , where we use the notation: if  $a \in \mathbb{R}^n$  is a constant vector (without loss of generality the vector of ones) then we write  $(u)_X = (u)_{a,X} = \frac{1}{n} \sum_{i=1}^n u(x_i)$  and  $\ell_0^p(X) = \{u \in \ell^p(X) : (u)_X = 0\}$ .

**Lemma A.5.** *Let  $p > 1$ ,  $a \in \mathbb{R}^n$  be non-negative, and assume  $u, v \in \ell_{a,0}^p(X)$  satisfy*

$$-\operatorname{div} (|\nabla u|^{p-2} \nabla u)(x_i) = f(x_i)$$

and

$$-\operatorname{div} (|\nabla v|^{p-2} \nabla v)(x_i) = g(x_i)$$

for all  $i = 1, \dots, n$ , where  $f, g \in \ell_0^p(X)$ . Then,

$$\|u - v\|_{\ell^p(X)} \leq \begin{cases} C \lambda_p^{-q} \|f - g\|_{\ell^q(X)}^{1/(p-1)} & \text{if } p \geq 2 \\ C \lambda_p^{-2} (\|\nabla u\|_{\ell^p(X)} + \|\nabla v\|_{\ell^p(X)})^{2-p} \|f - g\|_{\ell^2(X)} & \text{if } 1 < p < 2 \end{cases}$$

where  $C$  is a constant depending only on  $p$  and  $q = \frac{p}{p-1}$ .

**Remark A.6.** If  $-\operatorname{div} (|\nabla u|^{p-2} \nabla u) = f$  then we can write  $(|\nabla u|^{p-2} \nabla u, \nabla \varphi)_{\ell^2(X^2)} = (f, \varphi)_{\ell^2(X)}$  for any  $\varphi \in \ell^2(X)$ . Choosing  $\varphi = u$  implies  $\|\nabla u\|_{\ell^p(X^2)}^p = (f, u)_{\ell^2(X)} \leq \|f\|_{\ell^q(X)} \|u\|_{\ell^p(X)}$  so we could write the bound for  $p \in (1, 2)$  in the above lemma without  $\|\nabla u\|_{\ell^p(X)}$  and  $\|\nabla v\|_{\ell^p(X)}$  on the right hand side.

*Proof.* For  $p \geq 2$  we use the identity

$$|a - b|^p \leq C(|a|^{p-2}a - |b|^{p-2}b) \cdot (a - b)$$

for vectors  $a, b \in \mathbb{R}^k$  for some constant  $C$  depending only on  $p$  (which can be found in Lemma 4.4 Chapter I (DiBenedetto, 1993)) to obtain

$$\begin{aligned}
 \|\nabla u - \nabla v\|_{\ell^p(X^2)}^p &= \frac{1}{2} \sum_{i,j=1}^n w_{ij} |\nabla u(x_i, x_j) - \nabla v(x_i, x_j)|^p \\
 &\leq C \sum_{i,j=1}^n w_{ij} (|\nabla u(x_i, x_j)|^{p-2} \nabla u(x_i, x_j) - |\nabla v(x_i, x_j)|^{p-2} \nabla v(x_i, x_j)) \cdot (\nabla u(x_i, x_j) - \nabla v(x_i, x_j)) \\
 &= C(|\nabla u|^{p-2} \nabla u - |\nabla v|^{p-2} \nabla v, \nabla(u - v))_{\ell^2(X^2)} \\
 &= C(-\operatorname{div}(|\nabla u|^{p-2} \nabla u) + \operatorname{div}(|\nabla v|^{p-2} \nabla v), u - v)_{\ell^2(X)} \\
 &= C(f - g, u - v)_{\ell^2(X)} \\
 &\leq C\|f - g\|_{\ell^q(X)} \|u - v\|_{\ell^p(X)},
 \end{aligned}$$

where in the last line we used Hölder's inequality,  $\frac{1}{p} + \frac{1}{q} = 1$ , and the value of  $C$  may change from line-to-line. By Proposition A.4 we have

$$\lambda_p^p \|u - v\|_{\ell^p(X)}^p \leq \|\nabla u - \nabla v\|_{\ell^p(X^2)}^p \leq C\|f - g\|_{\ell^q(X)} \|u - v\|_{\ell^p(X)}.$$

Therefore we deduce

$$\|u - v\|_{\ell^p(X)} \leq C\lambda_p^{-q} \|f - g\|_{\ell^q(X)}^{1/(p-1)}.$$

Now for  $1 < p < 2$  we follow the proof of Lemma 4.4 in Chapter I (DiBenedetto, 1993) to infer

$$\begin{aligned}
 (|a|^{p-2}a - |b|^{p-2}b) \cdot (a - b) &= \int_0^1 |sa + (1-s)b|^{p-2} |a - b|^2 ds \\
 &\quad + (p-2) \int_0^1 |sa + (1-s)b|^{p-4} |(sa + (1-s)b) \cdot (a - b)|^2 ds
 \end{aligned}$$

for any  $a, b \in \mathbb{R}^k$ . Hence, by the Cauchy Schwarz inequality,

$$\begin{aligned}
 (|a|^{p-2}a - |b|^{p-2}b) \cdot (a - b) &\geq (p-1) \int_0^1 |sa + (1-s)b|^{p-2} |a - b|^2 ds \\
 &\geq (p-1) |a - b|^2 \int_0^1 \frac{1}{(s|a| + (1-s)|b|)^{2-p}} ds \\
 &\geq \frac{(p-1) |a - b|^2}{(|a| + |b|)^{2-p}}.
 \end{aligned}$$

In the sequel we make use of the inequality

$$(|a|^{p-2}a - |b|^{p-2}b) \cdot (a - b) \geq \frac{C|a - b|^2}{(|a| + |b|)^{2-p}}.$$

By Hölder's inequality and the above inequality we have (where again the constant  $C$  may change from line-to-line)

$$\begin{aligned}
\|\nabla u - \nabla v\|_{\ell^p(X^2)}^p &= \frac{1}{2} \sum_{i,j=1}^n w_{ij} |\nabla u(x_i, x_j) - \nabla v(x_i, x_j)|^p \\
&\leq \left( \frac{1}{2} \sum_{i,j=1}^n \frac{w_{ij} |\nabla u(x_i, x_j) - \nabla v(x_i, x_j)|^2}{(|\nabla u(x_i, x_j)| + |\nabla v(x_i, x_j)|)^{2-p}} \right)^{\frac{p}{2}} \left( \frac{1}{2} \sum_{i,j=1}^n w_{ij} (|\nabla u(x_i, x_j)| + |\nabla v(x_i, x_j)|)^p \right)^{\frac{2-p}{2}} \\
&\leq C \left( \sum_{i,j=1}^n w_{ij} (|\nabla u(x_i, x_j)|^{p-2} \nabla u(x_i, x_j) - |\nabla v(x_i, x_j)|^{p-2} \nabla v(x_i, x_j)) \cdot (\nabla u(x_i, x_j) - \nabla v(x_i, x_j)) \right)^{\frac{p}{2}} \\
&\quad \times (\|\nabla u\|_{\ell^p(X^2)} + \|\nabla v\|_{\ell^p(X^2)})^{\frac{(2-p)p}{2}} \\
&= C (|\nabla u|^{p-2} \nabla u - |\nabla v|^{p-2} \nabla v, \nabla(u - v))_{\ell^2(X^2)}^{\frac{p}{2}} (\|\nabla u\|_{\ell^p(X^2)} + \|\nabla v\|_{\ell^p(X^2)})^{\frac{(2-p)p}{2}} \\
&= C (-\operatorname{div}(|\nabla u|^{p-2} \nabla u) + \operatorname{div}(|\nabla v|^{p-2} \nabla v), u - v)_{\ell^2(X)}^{\frac{p}{2}} (\|\nabla u\|_{\ell^p(X^2)} + \|\nabla v\|_{\ell^p(X^2)})^{\frac{(2-p)p}{2}} \\
&= C (f - g, u - v)_{\ell^2(X)}^{\frac{p}{2}} (\|\nabla u\|_{\ell^p(X^2)} + \|\nabla v\|_{\ell^p(X^2)})^{\frac{(2-p)p}{2}} \\
&\leq C \|f - g\|_{\ell^2(X)}^{\frac{p}{2}} \|u - v\|_{\ell^2(X)}^{\frac{p}{2}} (\|\nabla u\|_{\ell^p(X^2)} + \|\nabla v\|_{\ell^p(X^2)})^{\frac{(2-p)p}{2}}.
\end{aligned}$$

Combining the above with Proposition A.4 we have

$$\lambda_p^p \|u - v\|_{\ell^p(X)}^{\frac{p}{2}} \leq C \|f - g\|_{\ell^2(X)}^{\frac{p}{2}} (\|\nabla u\|_{\ell^p(X^2)} + \|\nabla v\|_{\ell^p(X^2)})^{\frac{(2-p)p}{2}}$$

which implies the result.  $\square$

The final proof from Section 2.2 is Lemma A.3.

*Proof of Lemma A.3.* Let us write

$$I_{p,\mu}(u) = \frac{1}{p} \|\nabla u\|_{\ell^p(X^2)}^p - \mu \sum_{j=1}^m (y_j - \bar{y}_u) \cdot u(x_j).$$

We note that

$$I_{p,\mu}(\mu^{1/(p-1)} u) = \mu^{p/(p-1)} I_{p,1}(u).$$

Therefore

$$I_{p,\mu}(u_\mu) = \mu^{p/(p-1)} I_{p,1}(u_\mu \mu^{-1/(p-1)}) \geq \mu^{p/(p-1)} I_{p,1}(u_1).$$

On the other hand

$$\mu^{p/(p-1)} I_{p,1}(u_1) = I_{p,\mu}(\mu^{1/(p-1)} u_1) \geq I_{p,\mu}(u_\mu)$$

Therefore

$$I_{p,\mu}(\mu^{1/(p-1)} u_1) = I_{p,\mu}(u_\mu).$$

By uniqueness in Theorem A.1 we have  $u_\mu = \mu^{1/(p-1)} u_1$ , which completes the proof.  $\square$

### A.3. Proofs for Section 2.4

We now turn our attention to the Ginzburg–Landau approximation of the graph cut problem (2.11).

*Proof of Theorem 2.4.* Let us redefine  $\text{GL}_\tau$  in a more general form,

$$\text{GL}_\tau(u) = \frac{1}{2} \|\nabla u\|_{\ell^2(X^2)}^2 + \frac{1}{\tau} \sum_{i=1}^n V(u(x_i))$$



where  $V : \mathbb{R}^k \rightarrow [0, +\infty)$  is continuous and  $V(t) = 0$  if and only if  $t \in S_k$ . Of course, the choice of  $V(t) = \prod_{j=1}^k |t - \mathbf{e}_j|^2$  satisfies these assumptions. We let

$$\begin{aligned} \mathcal{E}_\tau(u) &= \begin{cases} \text{GL}_\tau(u) - \mu \sum_{j=1}^m (y_j - \bar{y}_u) \cdot u(x_j) & \text{if } (u)_X = b \\ +\infty & \text{else,} \end{cases} \\ \mathcal{E}_0(u) &= \begin{cases} \frac{1}{2} \|\nabla u\|_{\ell^2(X^2)}^2 - \mu \sum_{j=1}^m (y_j - \bar{y}_u) \cdot u(x_j) & \text{if } (u)_X = b \text{ and } u : X \rightarrow S_k \\ +\infty & \text{else.} \end{cases} \end{aligned}$$

The theorem can be restated as showing that minimisers  $u_\tau$  of  $\mathcal{E}_\tau$  contain convergent subsequences, and any convergent subsequence converges to a minimiser of  $\mathcal{E}_0$ . We divide the proof into two steps, in the first step we show that the sequence of minimisers  $\{u_\tau\}_{\tau>0}$  is precompact, in the second step we show that any convergent subsequence is converging to a minimiser of  $\mathcal{E}_0$ .

**1. Compactness.** We first show that any sequence  $\{u'_\tau\}_{\tau>0}$  and  $M \in \mathbb{R}$  satisfying  $\sup_{\tau>0} \mathcal{E}_\tau(u'_\tau) \leq M$  is precompact. By Proposition A.4 and the Cauchy–Schwarz inequality

$$\begin{aligned} M &\geq \frac{\lambda_2^2}{2} \|u'_\tau - b\|_{\ell^2(X)}^2 + \underbrace{\frac{1}{\tau} \sum_{i=1}^n V(u'_\tau(x_i))}_{\geq 0} - \mu \underbrace{\sqrt{\sum_{j=1}^m (y_j - \bar{y}_u)^2}}_{=: C} \|u'_\tau\|_{\ell^2(X)} \\ &\geq \frac{\lambda_2^2}{2} \|u'_\tau - b\|_{\ell^2(X)}^2 - C\mu \|u'_\tau - b\|_{\ell^2(X)} - C\mu \|b\|_{\ell^2(X)}. \end{aligned}$$

Hence,

$$\|u'_\tau - b\|_{\ell^2(X)} \leq \frac{C\mu}{\lambda_2^2} \left( 1 + \sqrt{1 + \frac{2\lambda_2^2(M + C\mu\|b\|_{\ell^2(X)})}{C^2\mu^2}} \right) =: \tilde{C}$$

so  $\{u'_\tau\}_{\tau>0}$  is bounded in  $\ell^2(X)$  and therefore, by the Bolzano–Weierstrass Theorem, precompact.

To show that minimisers  $\{u_\tau\}_{\tau>0}$  are precompact it is enough to show that there exists  $M \in \mathbb{R}$  such that  $\sup_{\tau>0} \mathcal{E}_\tau(u_\tau) \leq M$ . This follows easily as we take  $u \in \ell^2(X)$  satisfying  $\sum_{i=1}^n u(x_i) = b$  and  $u(x_i) \in S_k$  for all  $i = 1, 2, \dots, n$  as a candidate. We have

$$\mathcal{E}_\tau(u_\tau) \leq \mathcal{E}_\tau(u) = \frac{1}{2} \|\nabla u\|_{\ell^2(X^2)}^2 - \mu \sum_{j=1}^m (y_j - \bar{y}_u) \cdot u(x_j) =: M.$$

Now we have shown that there exists convergent subsequences we show that any limit must be a minimiser of  $\mathcal{E}_0$ .

**2. Converging Subsequences.** Let  $u_0$  be a cluster point of  $\{u_\tau\}_{\tau>0}$ , i.e. there exists a subsequence such that  $u_{\tau_m} \rightarrow u_0$  as  $m \rightarrow \infty$ . Pick any  $v \in \ell^2(X)$  with  $\mathcal{E}_0(v) < +\infty$ . We will show

- (a)  $\mathcal{E}_\tau(v) = \mathcal{E}_0(v)$ ,
- (b)  $\liminf_{\tau \rightarrow 0} \mathcal{E}_\tau(u_\tau) \geq \mathcal{E}_0(u_0)$ .

Assuming (a) and (b) hold then, by (a),

$$\mathcal{E}_0(v) = \mathcal{E}_{\tau_m}(v) \geq \mathcal{E}_{\tau_m}(u_{\tau_m}).$$

Taking the limit as  $m \rightarrow \infty$ , and applying (b) we have

$$\mathcal{E}_0(v) \geq \liminf_{m \rightarrow \infty} \mathcal{E}_{\tau_m}(u_{\tau_m}) \geq \mathcal{E}_0(u_0).$$

It follows that for all  $v \in \ell^2(X)$  we have  $\mathcal{E}_0(u_0) \leq \mathcal{E}_0(v)$ , hence  $u_0$  is a minimiser of  $\mathcal{E}_0$ .

To show (a), we easily notice that

$$\mathcal{E}_\tau(v) = \frac{1}{2} \|\nabla v\|_{\ell^2(X^2)}^2 + \frac{1}{\tau} \sum_{i=1}^n \underbrace{V(v(x_i))}_{=0} - \mu \sum_{j=1}^m (y_j - \bar{y}_u) \cdot v(x_j) = \mathcal{E}_0(v).$$

For (b) we without loss of generality assume that  $u_\tau \rightarrow u_0$  and

$$\liminf_{\tau \rightarrow 0} \mathcal{E}_\tau(u_\tau) = \lim_{\tau \rightarrow 0} \mathcal{E}_\tau(u_\tau) < +\infty.$$

As  $\sum_{i=1}^n u_\tau(x_i) = b$  for all  $\tau > 0$  and  $u_\tau(x_i) \rightarrow u_0(x_i)$  for every  $i \in \{1, \dots, n\}$  then  $(u_0)_X = \sum_{i=1}^n u_0(x_i) = b$ . And since  $V(u_\tau(x_i)) \leq \tau \mathcal{E}_\tau(u_\tau) \rightarrow 0$  then we have  $V(u_0(x_i)) = 0$ , hence  $u_0(x_i) \in S_k$ . Now,

$$\mathcal{E}_\tau(u_\tau) = \underbrace{\frac{1}{2} \|\nabla u_\tau\|_{\ell^2(X^2)}^2}_{\rightarrow \frac{1}{2} \|\nabla u_0\|_{\ell^2(X^2)}^2} + \frac{1}{\tau} \sum_{i=1}^n \underbrace{V(u_\tau(x_i))}_{\geq 0} - \mu \underbrace{\sum_{j=1}^m (y_j - \bar{y}_u) \cdot u_\tau(x_j)}_{\rightarrow \sum_{j=1}^m (y_j - \bar{y}_u) \cdot u_0(x_j)}.$$

So  $\liminf_{\tau \rightarrow 0} \mathcal{E}_\tau(u_\tau) \geq \mathcal{E}_0(u_0)$  as required.  $\square$

**Remark A.7.** If (a) and (b) in the proof of Theorem 2.4 are strengthened to

(a') for all  $v \in \ell^2(X)$  there exists  $v_\tau \rightarrow v$  such that  $\lim_{\tau \rightarrow 0} \mathcal{E}_\tau(v_\tau) = \mathcal{E}_0(v)$ ,

(b') for all  $v \in \ell^2(X)$  and for all  $v_\tau \rightarrow v$  then  $\liminf_{\tau \rightarrow 0} \mathcal{E}_\tau(v_\tau) \geq \mathcal{E}_0(v)$

then one says that  $\mathcal{E}_\tau$   $\Gamma$ -converges to  $\mathcal{E}_0$  (and one can show that (a') and (b') hold in our case with a small modification of the above proof). The notion of  $\Gamma$ -convergence is fundamental in the calculus of variations and is considered the variational form of convergence as it implies (when combined with a compactness result) the convergence of minimisers.

## B. Continuum limits

We briefly discuss continuum limits for the Poisson learning problem (2.3). We take  $p = 2$  for simplicity, but the arguments extend similarly to other values of  $p \geq 1$ . In order to analyze continuum limits of graph-based learning algorithms, we make the *manifold assumption*, and assume  $G$  is a random geometric graph sampled from an underlying manifold. To be precise, we assume the vertices of the graph corresponding to unlabeled points  $x_1, \dots, x_n$  are a sequence of *i.i.d.* random variables drawn from a  $d$ -dimensional compact, closed, and connected manifold  $\mathcal{M}$  embedded in  $\mathbb{R}^D$ , where  $d \ll D$ . We assume the probability distribution of the random variables has the form  $d\mu = \rho d\text{Vol}_{\mathcal{M}}$ , where  $\text{Vol}_{\mathcal{M}}$  is the volume form on the manifold, and  $\rho$  is a smooth density. For the labeled vertices in the graph, we take a fixed finite set of points  $\Gamma \subset \mathcal{M}$ . The vertices of the random geometric graph are

$$X_n := \{x_1, \dots, x_n\} \cup \Gamma.$$

We define the edge weights in the graph by

$$w_{xy} = \eta_\varepsilon(|x - y|),$$

where  $\varepsilon > 0$  is the length scale on which we connect neighbors,  $|x - y|$  is Euclidean distance in  $\mathbb{R}^D$ , and  $\eta : [0, \infty) \rightarrow [0, \infty)$  is smooth with compact support, and  $\eta_\varepsilon(t) = \frac{1}{\varepsilon^d} \eta\left(\frac{t}{\varepsilon}\right)$ . We denote the solution of the Poisson learning problem (2.3) for this random geometric graph by  $u_{n,\varepsilon}(x)$ .

The normalized graph Laplacian is given by

$$\mathcal{L}_{n,\varepsilon} u(x) = \frac{2}{\sigma_\eta n \varepsilon^2} \sum_{y \in X_n} \eta_\varepsilon(|x - y|) (u(x) - u(y)),$$

where  $\sigma_\eta = \int_{\mathbb{R}^d} |z_1|^2 \eta(|z|) dz$ . It is well-known (see, e.g., (Hein et al., 2007)), that  $\mathcal{L}_{n,\varepsilon}$  is consistent with the (negative of) the weighted Laplace-Beltrami operator

$$\Delta_\rho := -\rho^{-1} \text{div}_{\mathcal{M}}(\rho^2 \nabla_{\mathcal{M}} u),$$

where  $\text{div}_{\mathcal{M}}$  is the manifold divergence and  $\nabla_{\mathcal{M}}$  is the manifold gradient. We write  $\text{div} = \text{div}_{\mathcal{M}}$  and  $\nabla = \nabla_{\mathcal{M}}$  now for convenience. In particular, for any  $u \in C^3(\mathcal{M})$  we have

$$|\mathcal{L}_{n,\varepsilon} u(x) - \Delta_\rho u(x)| \leq C(\|u\|_{C^3(\mathcal{M})} + 1)(\lambda + \varepsilon)$$

holds for all  $x \in X_n$  with probability at least  $1 - Cn \exp(-cn\varepsilon^{d+2}\lambda^2)$  for any  $0 < \lambda \leq 1$ , where  $C, c > 0$  are constants.

Using the normalised graph Laplacian in the Poisson learning problem (2.3) we write

$$\mathcal{L}_{n,\varepsilon} u_{n,\varepsilon}(x) = n \sum_{y \in \Gamma}^m (g(y) - \bar{y}_u) \delta_{x=y} \quad \text{for } x \in X_n, \quad (\text{B.1})$$

where  $g(y) \in \mathbb{R}$  denotes the label associated to  $y \in \Gamma$  and  $\bar{y}_u = \frac{1}{|\Gamma|} \sum_{x \in \Gamma} g(x)$ . We restrict to the scalar case (binary classification) for now. Note that the normalisation plays no role in the classification problem (2.2). To see what should happen in the continuum, as  $n \rightarrow \infty$  and  $\varepsilon \rightarrow 0$ , we multiply both sides of (B.1) by a smooth test function  $\varphi \in C^\infty(\mathcal{M})$ , sum over  $x \in X$ , and divide by  $n$  to obtain

$$\frac{1}{n} (\mathcal{L}_{n,\varepsilon} u_{n,\varepsilon}, \varphi)_{\ell^2(X)} = \sum_{y \in \Gamma} (g(y) - \bar{y}_u) \varphi(y). \quad (\text{B.2})$$

Since  $\mathcal{L}_{n,\varepsilon}$  is self-adjoint (symmetric), we have

$$(\mathcal{L}_{n,\varepsilon} u_{n,\varepsilon}, \varphi)_{\ell^2(X)} = (u_{n,\varepsilon}, \mathcal{L}_{n,\varepsilon} \varphi)_{\ell^2(X)} = (u_{n,\varepsilon}, \Delta_\rho \varphi)_{\ell^2(X)} + O((\lambda + \varepsilon) \|u_{n,\varepsilon}\|_{\ell^1(X)}).$$

We also note that

$$\sum_{y \in \Gamma} (g(y) - \bar{y}_u) \varphi(y) = \int_{\mathcal{M}} \sum_{y \in \Gamma} (g(y) - \bar{y}_u) \delta_y(x) \varphi(x) \, d\text{Vol}_{\mathcal{M}}(x),$$

where  $\delta_y$  is Dirac-Delta distribution centered at  $y \in \mathcal{M}$ , which has the property that

$$\int_{\mathcal{M}} \delta_y(x) \varphi(x) \, d\text{Vol}_{\mathcal{M}}(x) = \varphi(y)$$

for every smooth  $\varphi \in C^\infty(\mathcal{M})$ . Combining these observations with (B.2) we see that

$$\frac{1}{n} (u_{n,\varepsilon}, \Delta_\rho \varphi)_{\ell^2(X)} + O\left(\frac{(\lambda + \varepsilon)}{n} \|u_{n,\varepsilon}\|_{\ell^1(X)}\right) = \int_{\mathcal{M}} \sum_{y \in \Gamma} (g(y) - \bar{y}_u) \delta_y(x) \varphi(x) \, d\text{Vol}_{\mathcal{M}}(x).$$

If we can extend  $u_{n,\varepsilon}$  to a function on  $\mathcal{M}$  in a suitable way, then the law of large numbers would yield

$$\frac{1}{n} (u_{n,\varepsilon}, \Delta_\rho \varphi)_{\ell^2(X)} \approx \int_{\mathcal{M}} u_{n,\varepsilon}(x) \rho(x) \Delta_\rho \varphi(x) \, d\text{Vol}_{\mathcal{M}}(x).$$

Hence, if  $u_{n,\varepsilon} \rightarrow u$  as  $n \rightarrow \infty$  and  $\varepsilon \rightarrow 0$  in a sufficiently strong sense, then the function  $u : \mathcal{M} \rightarrow \mathbb{R}$  would satisfy

$$-\int_{\mathcal{M}} u \, \text{div}(\rho^2 \nabla \varphi) \, d\text{Vol}_{\mathcal{M}} = \int_{\mathcal{M}} \sum_{y \in \Gamma} (g(y) - \bar{y}_u) \delta_y(x) \varphi(x) \, d\text{Vol}_{\mathcal{M}}(x)$$

for every smooth  $\varphi \in C^\infty(\mathcal{M})$ . If  $u \in C^2(\mathcal{M})$ , then we can integrate by parts on the left hand side to find that

$$-\int_{\mathcal{M}} \varphi \, \text{div}(\rho^2 \nabla u) \, d\text{Vol}_{\mathcal{M}} = \int_{\mathcal{M}} \sum_{y \in \Gamma} (g(y) - \bar{y}_u) \delta_y(x) \varphi(x) \, d\text{Vol}_{\mathcal{M}}(x)$$

Since  $\varphi$  is arbitrary, this would show that  $u$  is the solution of the Poisson problem

$$-\text{div}(\rho^2 \nabla u) = \sum_{y \in \Gamma} (g(y) - \bar{y}_u) \delta_y \quad \text{on } \mathcal{M}. \quad (\text{B.3})$$

We conjecture that the solutions  $u_{n,\varepsilon}$  converge to the solution of (B.3) as  $n \rightarrow \infty$  and  $\varepsilon \rightarrow 0$  with probability one.

**Conjecture B.1.** Assume  $\rho$  is smooth. Assume that  $n \rightarrow \infty$  and  $\varepsilon = \varepsilon_n \rightarrow 0$  so that

$$\lim_{n \rightarrow \infty} \frac{n\varepsilon^{d+2}}{\log n} = \infty.$$

Let  $u \in C^\infty(\mathcal{M} \setminus \Gamma)$  be the solution of the Poisson equation (B.3) and  $u_{n,\varepsilon}$  solve the graph Poisson problem (B.1). Then with probability one

$$\lim_{n \rightarrow \infty} \max_{\substack{x \in X_n \\ \text{dist}(x, \Gamma) > \delta}} |u_{n,\varepsilon}(x) - u(x)| = 0$$

for all  $\delta > 0$ .

The conjecture states that  $u_{n,\varepsilon}$  converges to  $u$  uniformly as long as one stays a positive distance away from the source points  $\Gamma$ , where the solution  $u$  is singular. We expect the conjecture to be true, since similar results are known to hold when the source term on the right hand side is a smooth function  $f$ . The fact that the right hand side in (B.3) is highly singular, involving delta-mass concentration, raises difficult technical problems that will require new insights that are far beyond the scope of this paper.

**Remark B.2.** If Conjecture B.1 is true, it shows that Poisson learning is consistent with a well-posed continuum PDE for arbitrarily low label rates. This is in stark contrast to Laplace learning, which does not have a well-posed continuum limit unless the number of labels grows to  $\infty$  as  $n \rightarrow \infty$  sufficiently fast. This partially explains the superior performance of Poisson learning for low label rate problems.

## References

DiBenedetto, E. *Degenerate parabolic equations*. Springer Science & Business Media, 1993.

Hein, M., Audibert, J.-Y., and Luxburg, U. v. Graph Laplacians and their convergence on random neighborhood graphs. *Journal of Machine Learning Research*, 8(Jun):1325–1368, 2007.
